# Supplementary material for: Encapsulate α-MnO2 nanofiber within graphene layer to tune surface electronic structure for efficient ozone decomposition
Source: PubMed Central journal article supplement (PMC8260790; doi:10.1038/s41467-021-24424-x), 2021-07-06
Supplement: 41467_2021_24424_MOESM1_ESM.pdf [file 41467_2021_24424_MOESM1_ESM.pdf]

## *Supporting Information*

# **Encapsulate $\alpha$ -MnO<sub>2</sub> nanofiber within graphene layer to tune surface electronic structure for efficient ozone decomposition**

Guoxiang Zhu,<sup>a,b</sup> Wei Zhu,<sup>a,c</sup> Yang Lou,<sup>d</sup> Jun Ma,<sup>a,e</sup> Wenqing Yao,<sup>a</sup> Ruilong Zong,<sup>a</sup> Yongfa

Zhu<sup>a\*</sup>

<sup>a</sup>Department of Chemistry, Tsinghua University, Beijing 100084, China

<sup>b</sup>Institute of Chemical Materials, China Academy of Engineering Physics, Mianyang Sichuan, 621900, China

<sup>c</sup>College of Environmental and Chemical Engineering, Xi'an Polytechnic University, Xi'an 710048, China

<sup>d</sup>Key Laboratory of Synthetic and Biological Colloids, Ministry of Education, School of Chemical and Material Engineering, Jiangnan University, Wuxi Jiangsu, 214122, China

<sup>e</sup>College of Chemistry and Materials Science, Sichuan normal university, Chengdu Sichuan, 610066, China

### **Corresponding author:**

Yongfa Zhu

Address: Department of Chemistry, Tsinghua University, Beijing, 100084, China;

Email: [zhuyf@mail.tsinghua.edu.cn](mailto:zhuyf@mail.tsinghua.edu.cn);

Tel.: (+86)10-6278-7601;

Fax: (+86)10-6278-7601;

## 26 Contents

27 Section A. Supplemental Methods

28 Section B. Supplemental Data

29 Figure S1. The structure parameters of synthesized 7.50% MnO<sub>2</sub>@GR catalysts.

30 Figure S2. HR-TEM images of 7.50% MnO<sub>2</sub>@GR at different regions.

31 Figure S3. HAADF-STEM image (a) and corresponding EDX linear scanning (b) and  
32 maps scanning maps of  $\alpha$ -MnO<sub>2</sub> for K (d), O (e), Mn (f) and combined image (c).

33 Figure S4. Optical micrographs of  $\alpha$ -MnO<sub>2</sub> (a) and 7.50% MnO<sub>2</sub>@GR (b) with 100  
34 magnifications.

35 Figure S5. The structure parameters of synthesized MnO<sub>2</sub>@GR catalysts.

36 Figure S6. The morphology of synthesized MnO<sub>2</sub>@GR catalysts.

37 Figure S7. The morphology of synthesized MnO<sub>2</sub>@GR catalysts.

38 Figure S8. O 1s spectra of fresh  $\alpha$ -MnO<sub>2</sub> nanowire and 7.50% MnO<sub>2</sub>@GR.

39 Figure S9. The catalytic performance and structural parameters of  $\alpha$ -MnO<sub>2</sub>, GO/MnO<sub>2</sub>  
40 and GO+MnO<sub>2</sub> catalysts.

41 Figure S10. SEM images of GR (a),  $\alpha$ -MnO<sub>2</sub> (b), GO/MnO<sub>2</sub> (c) and 7.5% MnO<sub>2</sub>@GR (d).

42 Figure S11. The effect of graphene layer on the ozone conversion of 7.50% MnO<sub>2</sub>@GR  
43 calcinated at 350°C for 4 h under air atmosphere.

44 Figure S12. The performance of regenerated  $\alpha$ -MnO<sub>2</sub> nanowires at different relative  
45 humidity.

46 Figure S13. The regeneration ability of MnO<sub>2</sub>@GR catalysts under different conditions.

47 Figure S14. The XRD patterns of OMS-2-HH and MnO<sub>x</sub>-HHB catalysts.

48 Figure S15. TEM images of OMS-2-HH (a) and MnO<sub>x</sub>-HHB (b). HRTEM images of  
49 OMS-2-HH (c) and MnO<sub>x</sub>-HHB (d).

50 Figure S16. The comparison on the regeneration ability of MnO<sub>2</sub>@GR and reported  
51 catalysts under different conditions.

52 Figure S17. SEM images of 7.50% MnO<sub>2</sub>@GR coated stainless steel mesh.

53 Figure S18. The accumulation of intermediated oxygen species.

54 Figure S19. Analysis of the surface bonding environment via XPS.

55 Figure S20. The AOS of Mn, surface adsorbed oxygen content in O 1s after 7.50%  
56 MnO<sub>2</sub>@GR treated with ozone for different time.

57 Figure S21. Dissociative chemisorption of an ozone molecule from the physisorbed states.

58 Figure S22. The simulated structures of MnO<sub>2</sub> (a) and graphene MnO<sub>2</sub>-one-OV/GR and  
59 MnO<sub>2</sub>-ten-OV/GR. The initial crystal structures of MnO<sub>2</sub> (a) and graphene. (b) The  
60 models of MnO<sub>2</sub>-one-OV/GR and MnO<sub>2</sub>-ten-OV/GR heterojunctions.

61 Figure S23. The optimized structure of MnO<sub>2</sub>-ten-OV@GR with different graphene  
62 layers and their charge density differences.

63 Figure S24. Ultraviolet Photoelectron Spectroscopy of Au.

64 Figure S25. Surface potential and UPS spectra of  $\alpha$ -MnO<sub>2</sub>, 7.50% MnO<sub>2</sub>@GR and GR.

65 Figure S26. The front view of the charge density differences (above) in MnO<sub>2</sub>-one-  
66 OV@GR (a) and MnO<sub>2</sub>-ten-OV@GR (b)

67 Figure S27. The model of graphene unit (left) and ozone molecule (right).

68

## 69 ● Section A: Supplemental Methods

### 70 A1: Catalyst characterization.

71 X-ray diffraction (XRD) patterns were collected via X-ray diffractometer (Rigaku D/max-  
72 2400,  $\lambda = 1.5406\text{\AA}$ ). Morphologies of the samples were obtained by a Field Emission Gun  
73 Scanning Electron Microscopy (FESEM, Hitachi SU-8010) and a transmission electron  
74 microscopy (TEM, Hitachi 7700) with an accelerating voltage of 100 kV. High resolution  
75 transmission electron microscopy (HRTEM) images were captured via a JEM 2100F field  
76 emission transmission electron microscope at an accelerating voltage of 200 kV. The element  
77 composition and distribution were recorded by an energy dispersive (EDS) detector equipped  
78 in JEM 2100F. XPS spectra were conducted in a PHI Quantera SXM<sup>TM</sup> system and the  
79 binding energy was calibrated with the signal for adventitious carbon at 284.8 eV. FT-IR spectra  
80 was recorded by Bruker V70 spectrometer. CHI-660D electrochemical system was used to  
81 examine the electrochemical measurements. Electrochemical impedance spectroscopy (EIS)  
82 were measured in a three-electrode quartz cells using 0.1 M Na<sub>2</sub>SO<sub>4</sub> as electrolyte solution.  
83 SCE served as reference electrode, platinum wire served as counter electrode, and sample film  
84 electrodes on glassy-carbon electrode used as working electrode.

85 Temperature programmed desorption (TPD) was carried out on a Cat-Lab (BEL Japen,  
86 Inc.) equipped with an online QIC-200 quadrupole mass (Inprocess Instruments, GAM 200) as  
87 a detector. Firstly, 20 mg sample was added into the U-type quartz reactor and heated at 120°C  
88 for 2 h in Ar atmosphere. When it cool to the room temperature, the sample was kept in a wet  
89 gas flow (50°C, Ar, RH=70%) for 1 h. Then the TPD process was carried out with a heating  
90 rate of 5°C/min.

### 91 A2: Catalyst evaluation.

92 The performance of catalyst for ozone decomposition was evaluated in a continuous fixed  
93 bed reactor at 25°C. For each test, 100 mg catalyst was used and the gas flowrate into the reactor  
94 was maintained at 900 mL/min. Ozone was generated by arc discharge in O<sub>2</sub> stream and the  
95 inlet ozone concentration was kept at  $50 \pm 1$  ppm by tuning the discharge voltage and the gas

96 flowrate through the ozonator (model 1000BT-12, Shanghai Enaly Mechanical and  
97 Electrical Technology Company). Then, the generated ozone mixed adequately with clear air  
98 in a mixing drum and then transported into the reactor. The inlet and outlet ozone concentration  
99 was recorded (model 202, 2B Technologies) and the ozone conversion was calculated through  
100 the following equation:

$$101 \quad \text{Ozone removal rate} = 100\% \times (C_{in} - C_{out})/C_{in}. \quad (1)$$

102 where  $C_{in}$  and  $C_{out}$  present inlet and outlet ozone concentration respectively.

### 103 **A3: DFT calculation methods**

104 All calculation were accomplished using density functional theory (DFT) with the  
105 projected augmented wave (PAW) method, as implemented within the VASP code. The  
106 Perdew-Burke-Ernzerhof (PBE) with Hubbard U corrections of generalized gradient  
107 approximation (GGA + U) was utilized as the exchange-correlation functional. In this work,  
108 we employ values of  $U-J = 3.9$  eV, for the spherical part of the interaction, and  $J = 1.0$  eV.<sup>1</sup> The  
109 valence atomic configurations were Mn:  $3p^63d^54s^2$ , O:  $2s^22p^4$ , C:  $2s^22p^3$ , respectively. The  
110 energy cutoff for a plane wave basis set was 400 eV, and a gamma centered Monkhorst-Pack  
111 k-mesh of  $2 \times 2 \times 1$  was used for heterojunction calculations. In geometry optimizations, the  
112 self-consistent convergence accuracy was set at  $1 \times 10^{-6}$  eV/atom and the atomic Hellman-  
113 Feynman forces are smaller than  $0.02\text{eV}/\text{\AA}$ . Furthermore, spin polarization, vdW correction  
114 proposed by Grimme and Dipole correction along Z direction were considered in all  
115 calculations.

116 The tetragonal  $\text{MnO}_2$  with space group of  $I4/M$  was selected as bulk  $\text{MnO}_2$ , in which each  
117 cell contained 36 atoms (12 Mn atoms and 24 O atoms). The lattice parameters of  $\text{MnO}_2$  are  
118  $a = 9.92\text{\AA}$ ,  $b = 9.92\text{\AA}$ ,  $c = 2.93\text{\AA}$ ,  $\alpha = \beta = \gamma = 90^\circ$ . For bulk graphene, the hexagonal graphene with  
119  $P63/mmc$  space group was taken, each cell contained 10 atoms and the lattice parameters of  
120 graphene are  $a = b = 2.47\text{\AA}$ ,  $c = 8.69\text{\AA}$ ,  $\alpha = \beta = 90^\circ$ ,  $\gamma = 120^\circ$ . **Figure S1a, b** shows the initial crystal  
121 structures of  $\text{MnO}_2$  and graphene. Here,  $\text{MnO}_2$ -one-OV/graphene and  $\text{MnO}_2$ -ten-  
122 OVs/graphene heterojunctions were modeled as the supercell slab, in which the geometry  
123 structure contained parallel graphene (001) and  $\text{MnO}_2$  (110) sheet. The (110) crystal plane of



124 MnO<sub>2</sub> was considered, because it has the lowest surface energy and is easy to dominate the  
125 largest surface area comparing with other crystal planes.<sup>2</sup> A commensurability was taken  
126 between graphene and MnO<sub>2</sub> sheet, where a 5×1 lateral periodicity of MnO<sub>2</sub> and 6×7 lateral  
127 periodicity of graphene sheet were employed. A vacuum space of 15Å in the Z direction was  
128 adopted to isolate slab as boundary condition. The side view of geometric structures of MnO<sub>2</sub>-  
129 one-OV/graphene and MnO<sub>2</sub>-all-OVs/graphene heterojunctions were shown in **Figure S1c, d**.  
130 The initial lattice parameters between the optimized MnO<sub>2</sub> and graphene sheet were presented  
131 in **Table S1**. The lattice mismatch ratios of initial lattice parameters are 1.20% for a and 4.43%  
132 for b, respectively.

## ● Section B: Supplemental Data

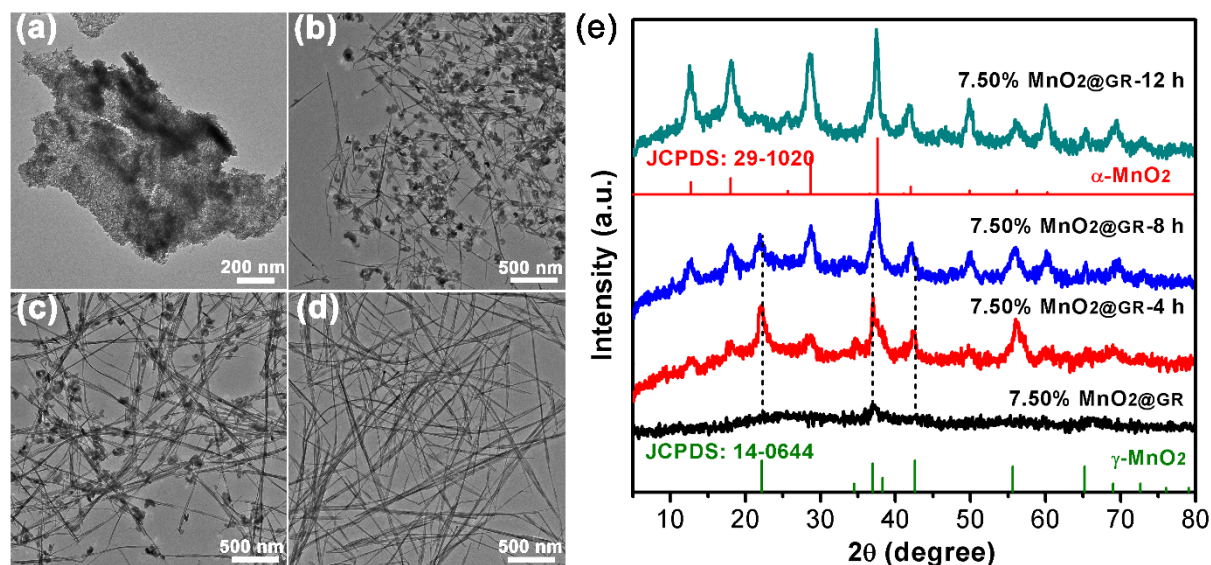

**Figure S1.** The structure parameters of synthesized 7.50% MnO<sub>2</sub>@GR catalysts. (a-d) TEM images of 7.50% MnO<sub>2</sub>@GR with varied hydrothermal time of 0 h, 4 h, 8 h, 12 h respectively. (e) XRD patterns of 7.50% MnO<sub>2</sub>@GR with varied hydrothermal time.

Ultrathin graphene encapsulated  $\alpha$ -MnO<sub>2</sub> nanofibers were prepared by a “complexation-reaction-growth” procedure.<sup>3</sup> Amorphous MnO<sub>2</sub> firstly formed on the graphene, then MnO<sub>6</sub> octahedron units grew into  $\alpha$ -MnO<sub>2</sub> and further transferred into  $\alpha$ -MnO<sub>2</sub> nanofiber. At the same times, large-area graphene was further exfoliated and frizzled, finally displaying a core-shell structure. When the hydrothermal time kept at 12 h, the obtained sample displayed a pure  $\alpha$ -MnO<sub>2</sub> (JCPDS No. 29-1020), in line with the variation of the morphology.

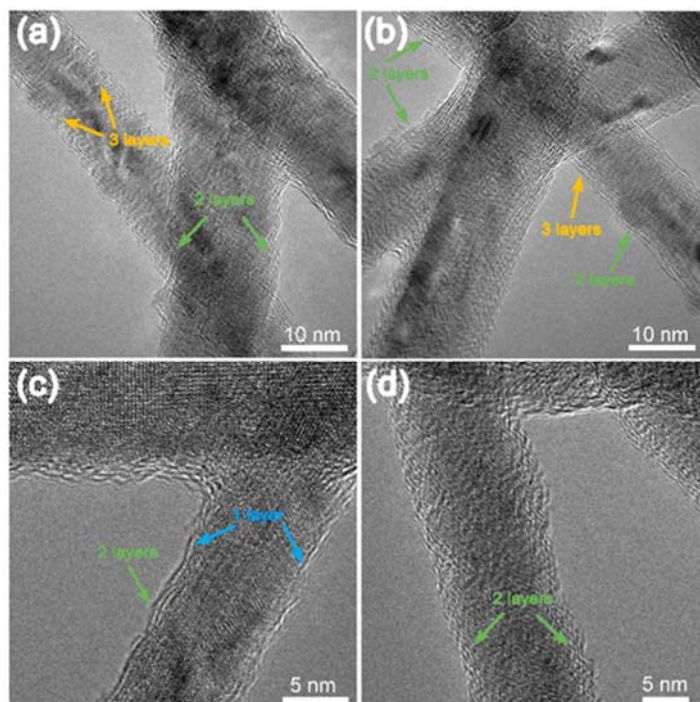

**Figure S2.** HRTEM images of 7.50% MnO<sub>2</sub>@GR at different regions.

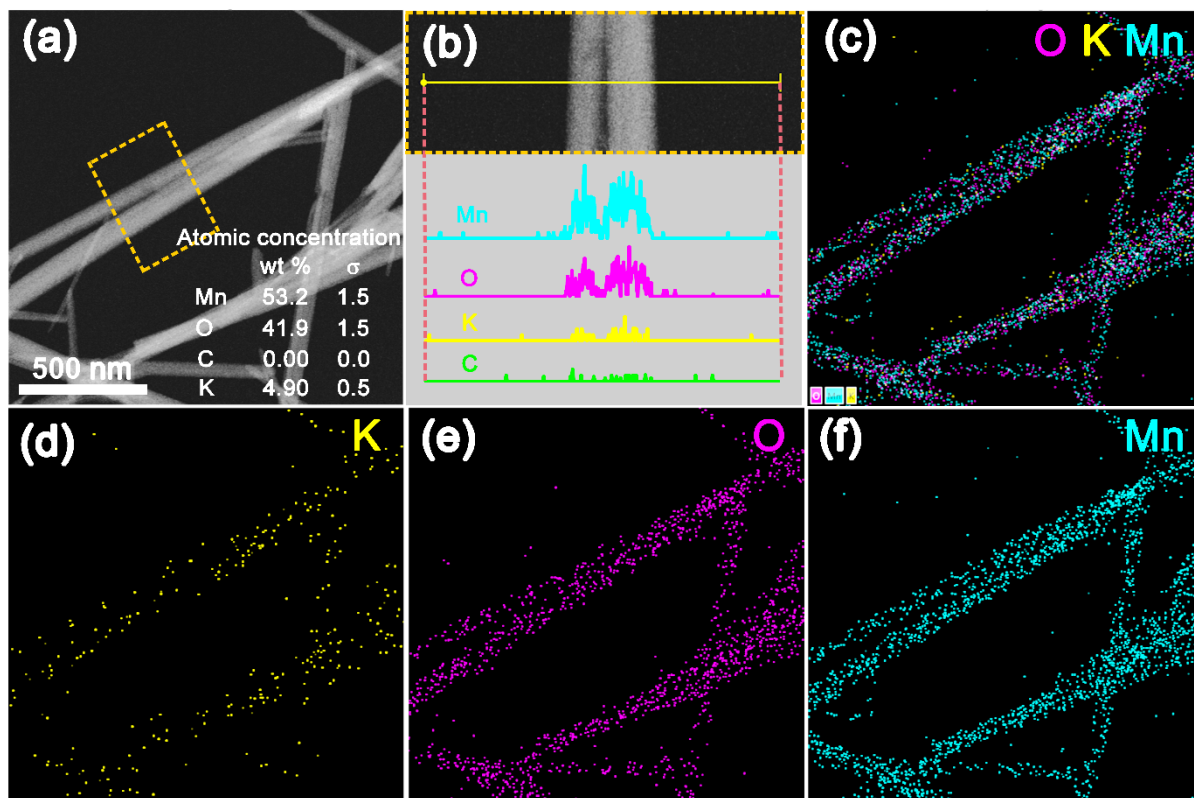

**Figure S3.** HAADF-STEM image (a) and corresponding EDX linear scanning (b) and maps scanning maps of  $\alpha$ - $\text{MnO}_2$  for K (d), O (e), Mn (f) and combined image (c).

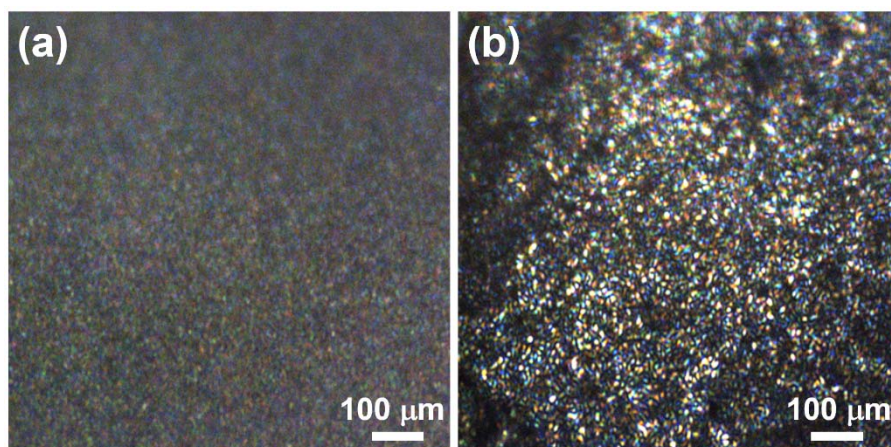

**Figure S4.** Optical micrographs of  $\alpha$ -MnO<sub>2</sub> (a) and 7.50% MnO<sub>2</sub>@GR (b) with 100 magnifications.

The optical micrographs shown that 7.50% MnO<sub>2</sub>@GR presented an obvious high gloss, which often appeared in graphene. This indicated that 7.50% MnO<sub>2</sub>@GR presented a uniform core-shell structure rather than local phenomenon. Therefore, the exposed surface in 7.50% MnO<sub>2</sub>@GR almost was graphene shells.



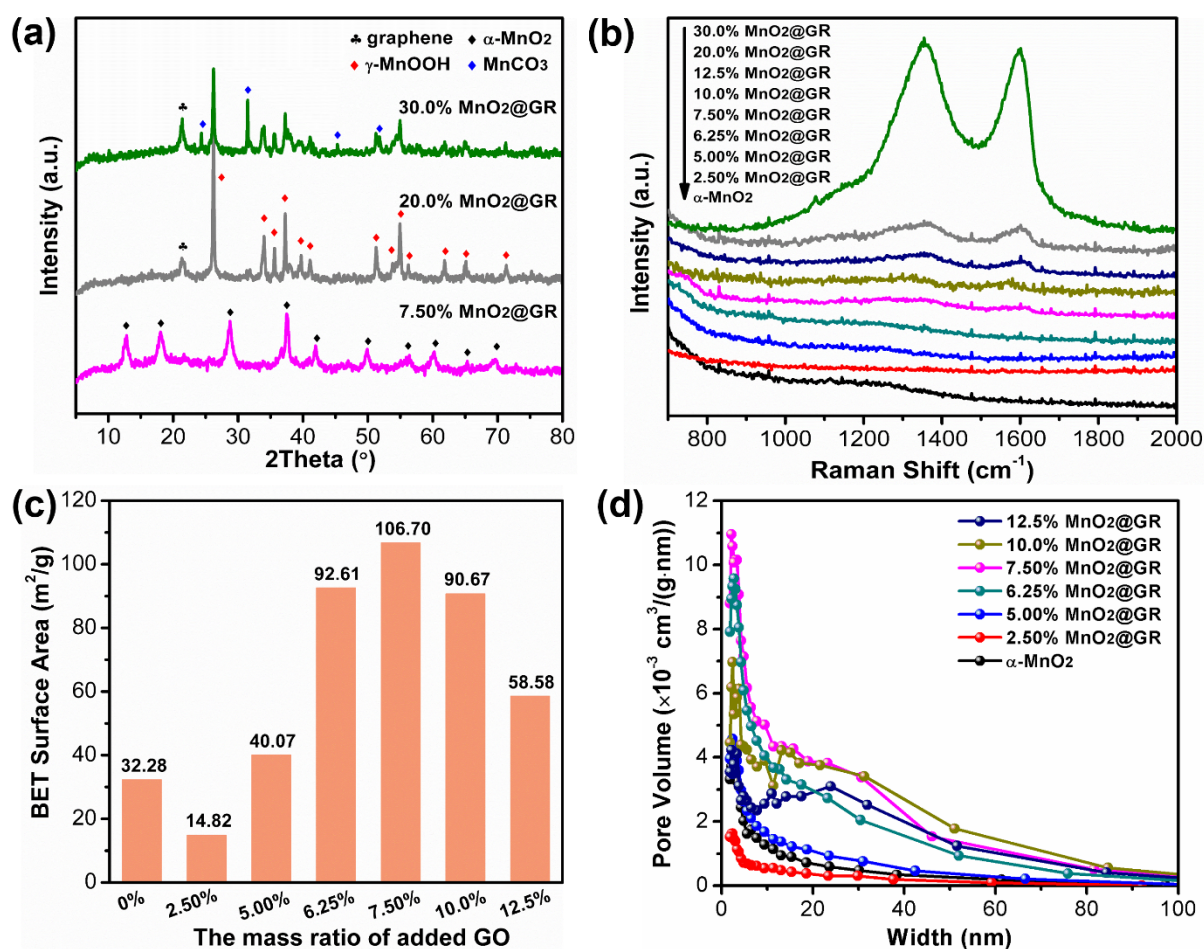

**Figure S5.** The structure parameters of synthesized MnO<sub>2</sub>@GR catalysts. (a) XRD patterns of 7.50% MnO<sub>2</sub>@GR, 20.0% MnO<sub>2</sub>@GR, 30.0% MnO<sub>2</sub>@GR. Raman shift (b), BET surface areas (c) and pore size distribution (d) of MnO<sub>2</sub>@GR with different ratio of GR.

As shown in **figure S5a**, α-MnO<sub>2</sub> would transfer to α-MnOOH and MnCO<sub>3</sub>, further confirming that the crystal structure of manganese oxide varied with the increase of the GO content, in agreement with the latest report.<sup>4</sup> Besides, the diffraction peak of graphene was only found in the XRD patterns of 20.0% MnO<sub>2</sub>@GR, 30.0% MnO<sub>2</sub>@GR, indicating a low content of graphene in 7.50% MnO<sub>2</sub>@GR. The Raman spectra (**figure S5b**) shown the peak intensity at 1347 cm<sup>-1</sup> and 1610 cm<sup>-1</sup> increased with the increase of the GO content, confirming the ultrathin graphene shells indeed existed on the surface of 7.50% MnO<sub>2</sub>@GR. The BET surface areas of 7.50% MnO<sub>2</sub>@GR also increased from 32.28 to 106.70 m<sup>2</sup>/g (**figure S5c**), comparing with MnO<sub>2</sub>, offering abundant active sites for ozone decomposition. The pore size distribution (**figure S5d**) shown a large amount of micropore and mesoporous existed in 7.50% MnO<sub>2</sub>@GR, corresponding to its hierarchical structure.

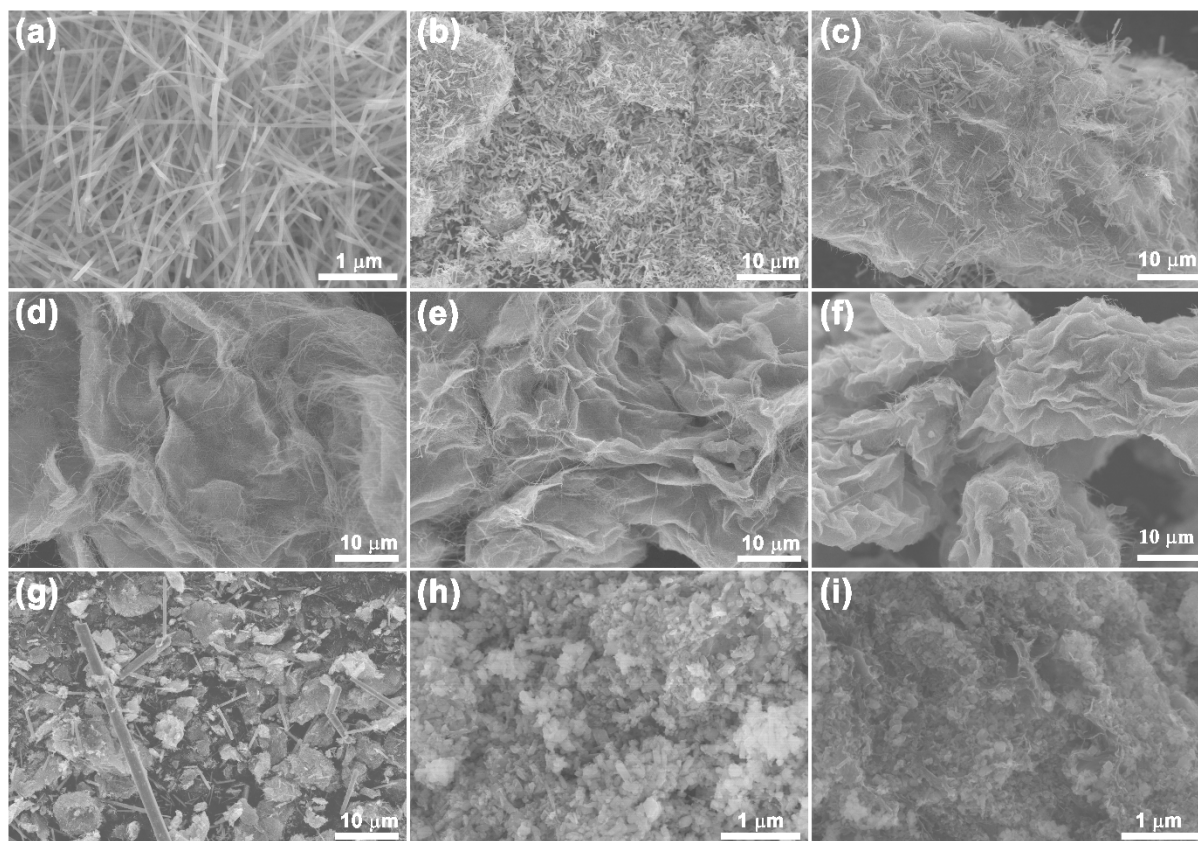

**Figure S6.** The morphology of synthesized MnO<sub>2</sub>@GR catalysts. SEM images of  $\alpha$ -MnO<sub>2</sub> nanowire (a), 2.50% MnO<sub>2</sub>@GR (b), 5.00% MnO<sub>2</sub>@GR (c), 6.25% MnO<sub>2</sub>@GR (d), 7.50% MnO<sub>2</sub>@GR (e), 10.0% MnO<sub>2</sub>@GR (f), 12.5% MnO<sub>2</sub>@GR (g), 20.0% MnO<sub>2</sub>@GR (h) and 30.0% MnO<sub>2</sub>@GR (i).

As shown in **figure S6**, the morphology varied with GO content, corresponding to the changes of the diffraction peak in XRD pattern. When GO content was lower than 7.5%, short nanorod was found, corresponding to  $\alpha$ -MnO<sub>2</sub>. When GO content reached at 7.5%,  $\alpha$ -MnO<sub>2</sub> totally transferred to  $\alpha$ -MnO<sub>2</sub> nanofiber. If GO content increased continuously,  $\alpha$ -MnOOH and MnCO<sub>3</sub> appeared. As shown in **figure S6e**, 7.50% MnO<sub>2</sub>@GR displayed a lamellar structure, similar to graphene network structure. Thus, it can be concluded that  $\alpha$ -MnO<sub>2</sub> nanofiber growth on the graphene layer.

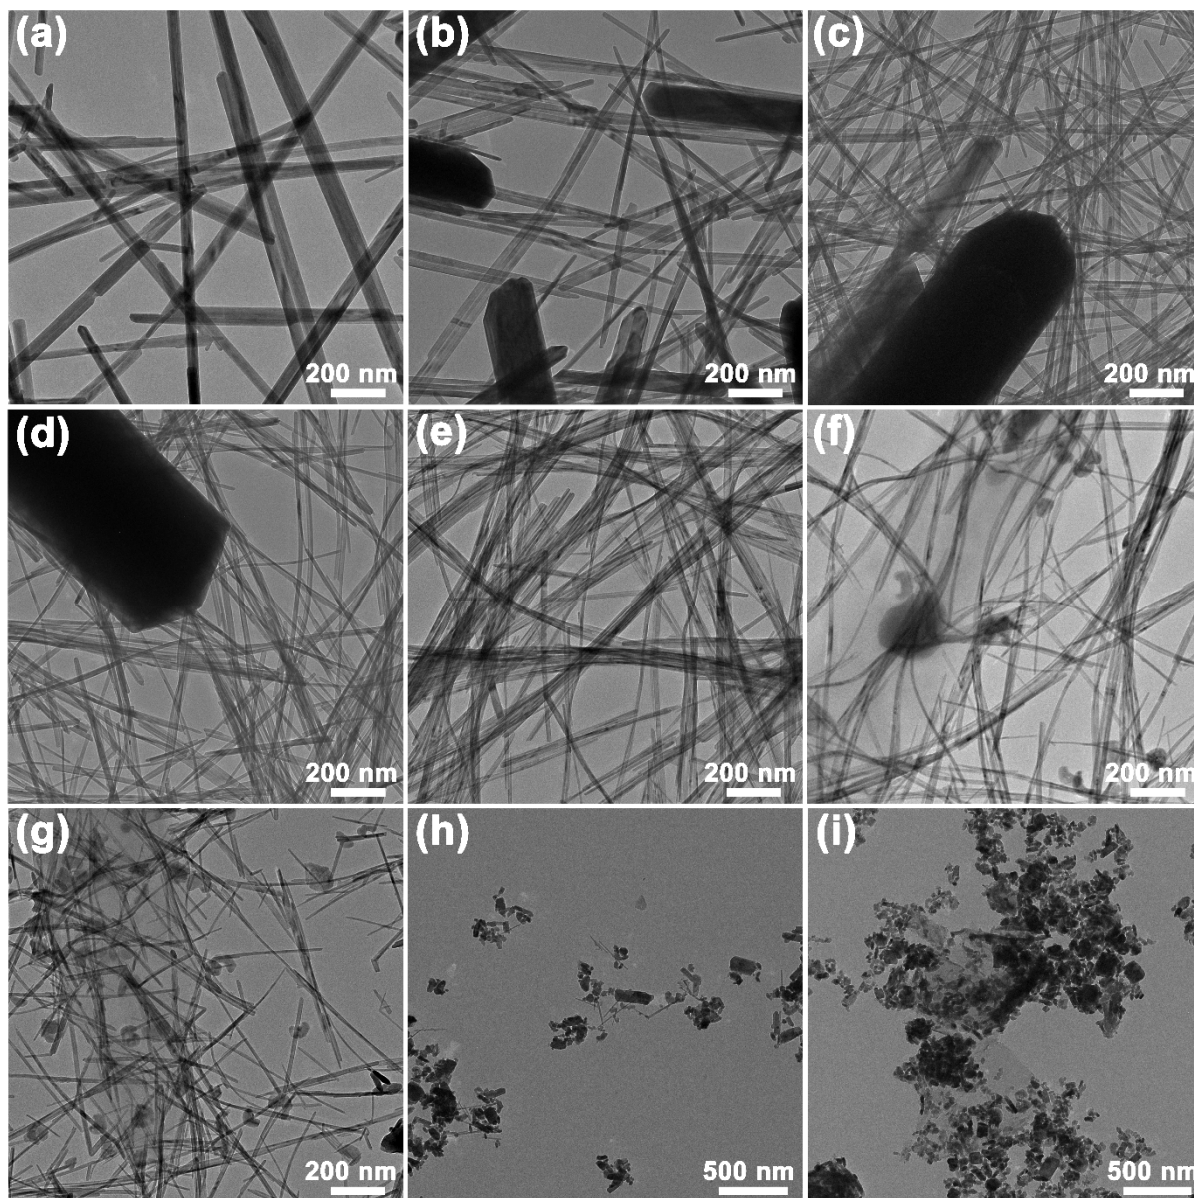

**Figure S7.** The morphology of synthesized MnO<sub>2</sub>@GR catalysts. TEM images of EM i<sub>2</sub> nanowire (a), 2.50% MnO<sub>2</sub>@GR (b), 5.00% MnO<sub>2</sub>@GR (c), 6.25% MnO<sub>2</sub>@GR (d), 7.50% MnO<sub>2</sub>@GR (e), 10.0% MnO<sub>2</sub>@GR (f), 12.5% MnO<sub>2</sub>@GR (g), 20.0% MnO<sub>2</sub>@GR (h) and 30.0% MnO<sub>2</sub>@GR (i).

As shown in **figure S7**, the effect of GO content on the crystal structure and morphology was further confirmed by TEM images. Importantly, graphene layer was not found until GO content reached at 10.0%, confirming that added GO almost coated on the  $\alpha$ -MnO<sub>2</sub> nanofiber. According to SEM and TEM images, it can be concluded that graphene layer was destroyed and coated on the surface of  $\alpha$ -MnO<sub>2</sub> nanofiber under the process of crystal reconstruction, consequently displaying a core-shell structure.



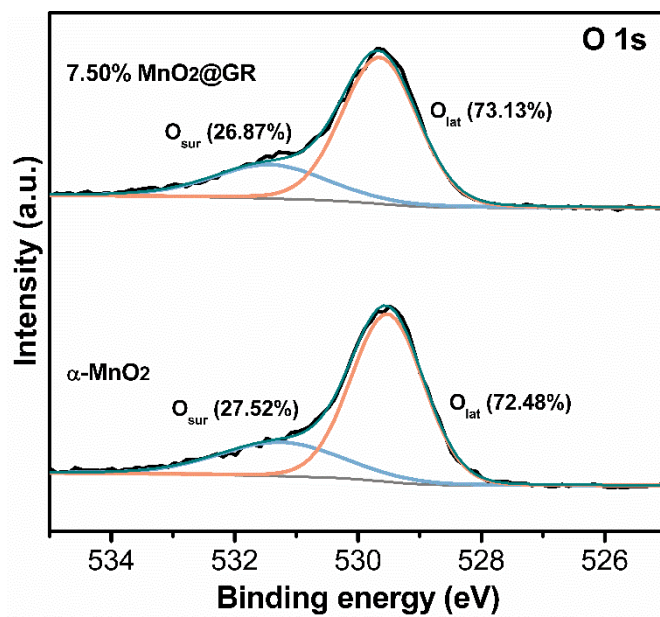

**Figure S8.** O 1s spectra of fresh  $\alpha$ -MnO<sub>2</sub> nanowire and 7.50% MnO<sub>2</sub>@GR.

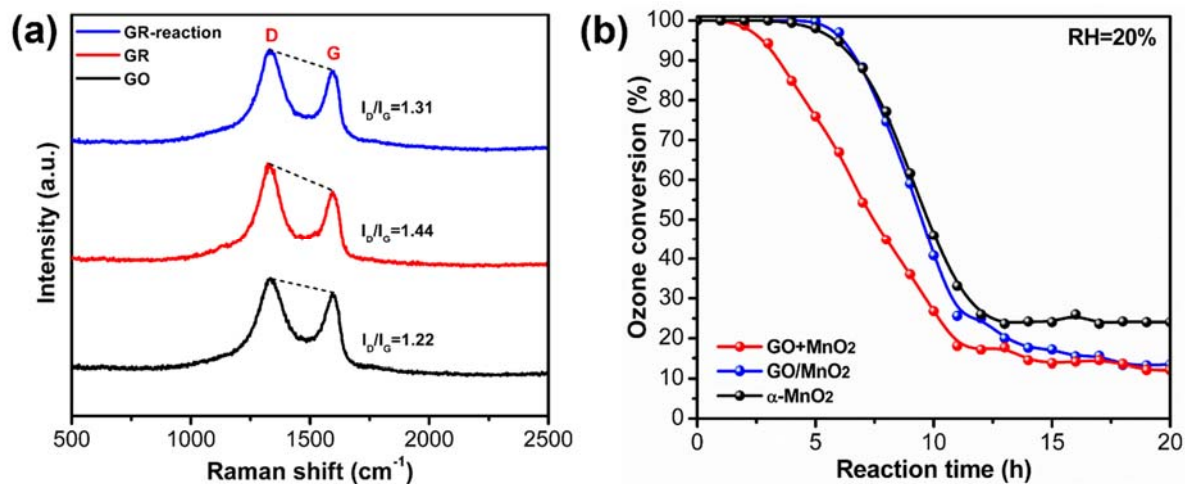

**Figure S9.** The catalytic performance and structural parameters of  $\alpha$ -MnO<sub>2</sub>, GO/MnO<sub>2</sub> and GO+MnO<sub>2</sub> catalysts. (a) Raman shift of GO, GR, GR-reaction (reaction for 20 h). (b) Ozone conversion on  $\alpha$ -MnO<sub>2</sub>, GO/MnO<sub>2</sub> and GO+MnO<sub>2</sub> (physical mixture).

1.0 g obtained  $\alpha$ -MnO<sub>2</sub> nanowires physically mixed with 75 mg GO aerogel (dehydrated via a freeze-drying process) to prepare GO+MnO<sub>2</sub>. In the Raman spectra, the peaks located at 1334 and 1597  $\text{cm}^{-1}$ , which were assigned to the G band and D band of graphene respectively and were used to quantify the density of defects in  $\text{sp}^2$  carbon atoms.<sup>5</sup> **Figure S9a** shown the integrated intensity ratio of  $I_D/I_G$  increased from 1.22 to 1.44 after a hydrothermal reduction, indicating more nongraphitic impurities formed in GR. After treated in ozone for 20 h, the ratio of  $I_D/I_G$  decreased to 1.31, suggesting the nongraphitic impurities could react with ozone molecule.

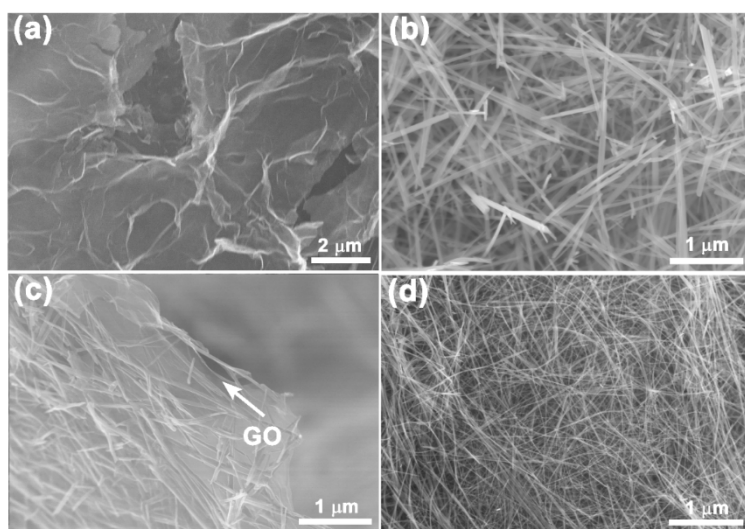

**Figure S10** SEM images of GR (a),  $\alpha$ -MnO<sub>2</sub> (b), GO/MnO<sub>2</sub> (c) and 7.5% MnO<sub>2</sub>@GR (d).

FESEM images in **figure S10** showed that GO/MnO<sub>2</sub> presented a regular composite structure, in which  $\alpha$ -MnO<sub>2</sub> nanowires were located on the surface of the large-areas graphene.

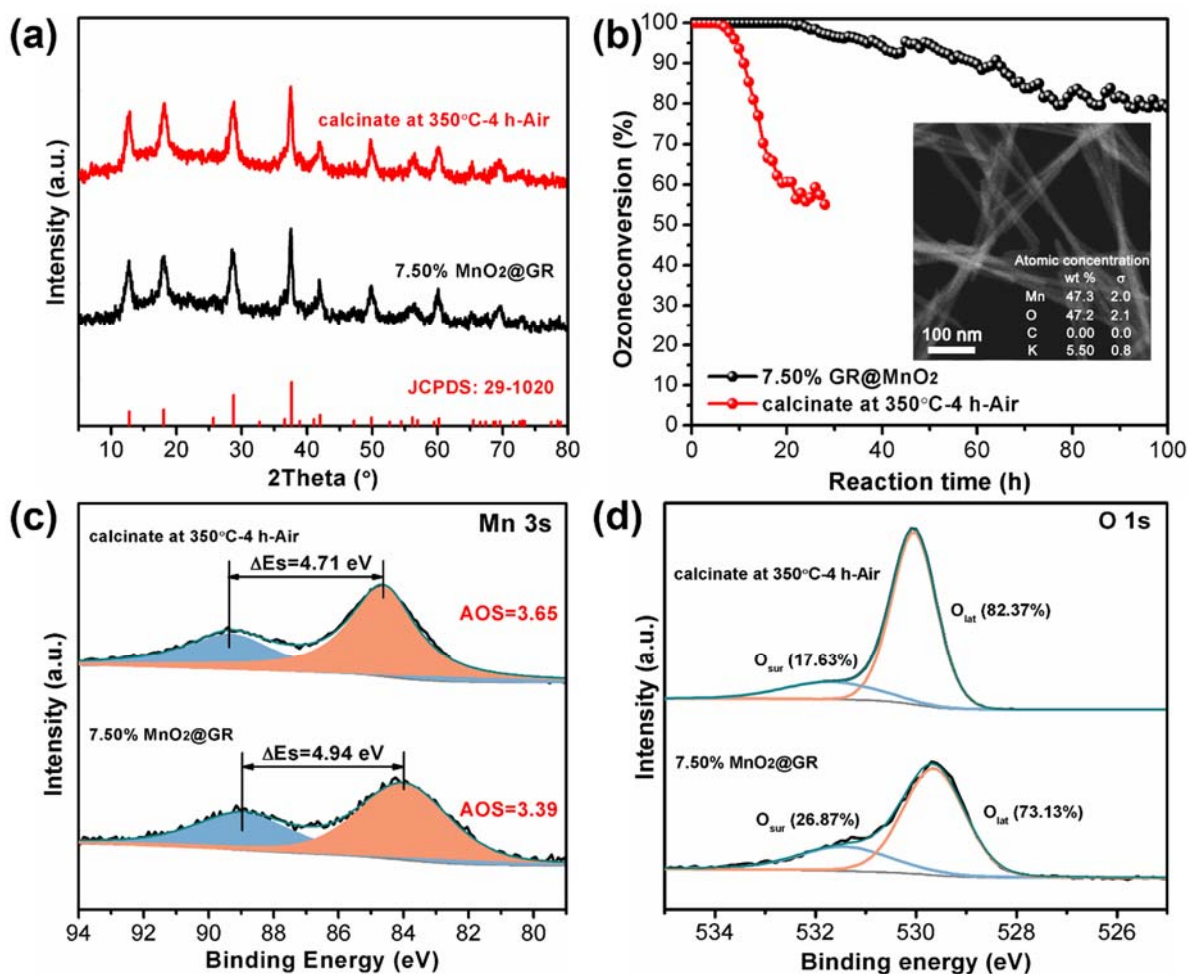

**Figure S11.** The effect of graphene layer on the ozone conversion of 7.50% MnO<sub>2</sub>@GR calcinated at 350°C for 4 h under air atmosphere. (a) XRD patterns of 7.50% MnO<sub>2</sub>@GR before and after calcination. (b) Ozone conversion of 7.50% MnO<sub>2</sub>@GR before and after calcination and the element content for calcinated 7.50% MnO<sub>2</sub>@GR obtained by EDS map scanning. Mn 3s (c) and O 1s (d) spectra of 7.50% MnO<sub>2</sub>@GR before and after calcination. Experimental conditions: 0.1 g catalyst, 50 ppm O<sub>3</sub>, flow rate = 900 mL/min, RH=20%, 25°C.

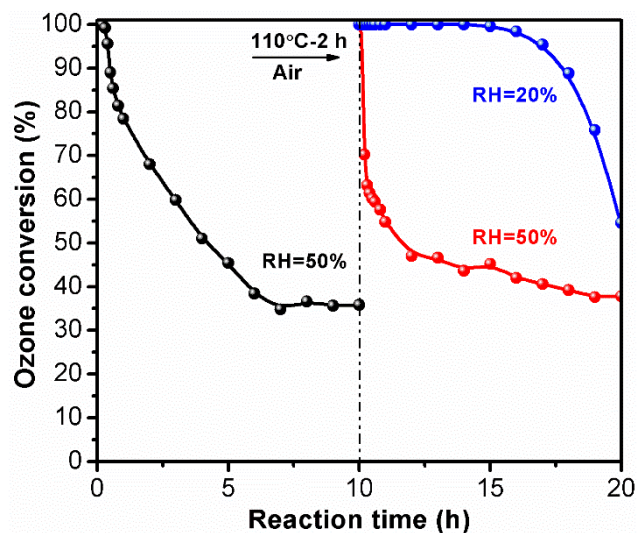

**Figure S12.** The performance of regenerated  $\alpha$ -MnO<sub>2</sub> nanowires at different relative humidity.

As shown in **figure S12**, the regenerated  $\alpha$ -MnO<sub>2</sub> nanowires exhibited an almost the same ozone conversion of fresh  $\alpha$ -MnO<sub>2</sub> nanowires at 20% RH, indicating that the decline of the ozone conversion at 50% RH resulted from water adsorption rather than the accumulation of the intermediated oxygen species.

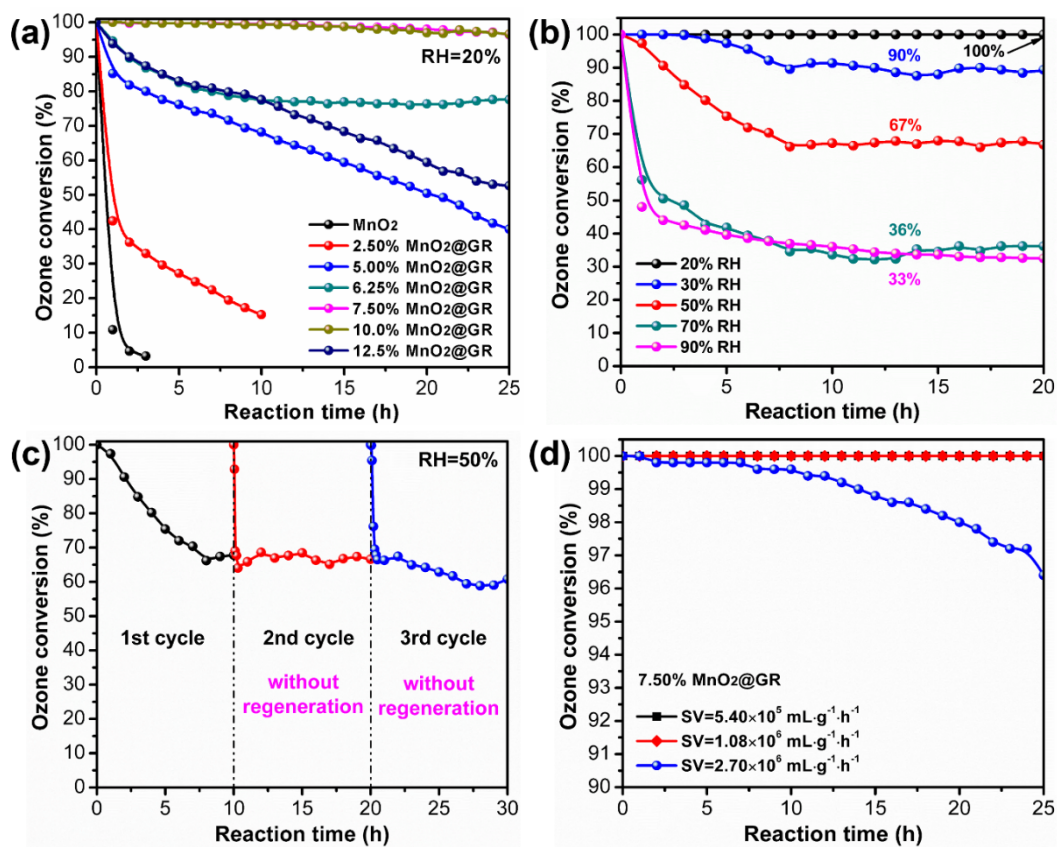

**Figure S13.** The regeneration ability of MnO<sub>2</sub>@GR catalysts under different conditions. (a) Ozone conversion on MnO<sub>2</sub>@GR with different content of GR (20 mg catalyst was used). (b) Ozone conversion on 7.50% MnO<sub>2</sub>@GR at different relative humidity. (c) The cycle performance of 7.50% MnO<sub>2</sub>@GR at 50% RH. (d) Ozone conversion on 7.50% MnO<sub>2</sub>@GR at different space velocity. Experimental conditions: 0.1 g catalyst (except for (a) and (d)), 50 ppm O<sub>3</sub>, flow rate = 900 mL/min, 25 °C.

Above results have indicated that the GO addition has a significant effect on the morphology and crystal structure of the catalyst. As displayed in **figure S13a**, 7.50% MnO<sub>2</sub>@GR exhibited the highest ozone conversion among the samples with different GR content, suggesting that the unique core-shell structure is important for the ozone decomposition. In addition, we investigated the ozone conversion on 7.50% MnO<sub>2</sub>@GR under different RH, as displayed in **figure S13b**. Because of the competitive adsorption, the conversion shown a sharp decrease and then remained stable in the wet gas flow. Although the stable conversion decreased with the increase of the RH, 7.50% MnO<sub>2</sub>@GR remained 67% ozone conversion at 50% RH, significantly higher than the ratio (35%, **figure 4b in the main manuscript**) of  $\alpha$ -MnO<sub>2</sub> nanowire. This suggested that the graphene indeed enhanced the ozone conversion efficiency under high humidity. As shown in **figure S13c**, the cycle performance of 7.50% MnO<sub>2</sub>@GR

was evaluated at 50% RH to explain the effect of regeneration. **figure S13d** has shown the ozone conversion on 7.50% MnO<sub>2</sub>@GR under different mass space velocity (WHSV). This indicated that the real catalytic performance of 7.50% MnO<sub>2</sub>@GR can be reflected when the space velocity is below  $1.80 \times 10^6 \text{ mL} \cdot \text{g}^{-1} \cdot \text{h}^{-1}$ .

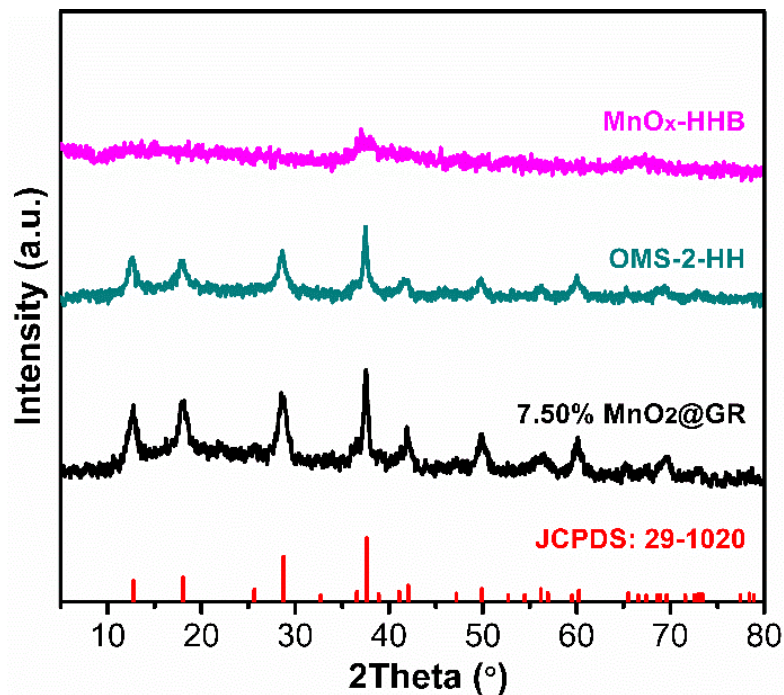

**Figure S14.** The XRD patterns of OMS-2-HH and MnO<sub>x</sub>-HHB catalysts. XRD patterns of 7.50% MnO<sub>2</sub>@GR, OMS-2-HH and MnO<sub>x</sub>-HHB.

To compare the catalytic performance of 7.50% MnO<sub>2</sub>@GR with the reported materials, OMS-2-HH<sup>6</sup> and MnO<sub>x</sub>-HHB<sup>7</sup> were prepared. As shown in **figure S14**, OMS-2-HH displayed a pure α-MnO<sub>2</sub> (JCPDS No. 29-1020) and MnO<sub>x</sub>-HHB has no obvious diffraction peak, in line with the reported results.



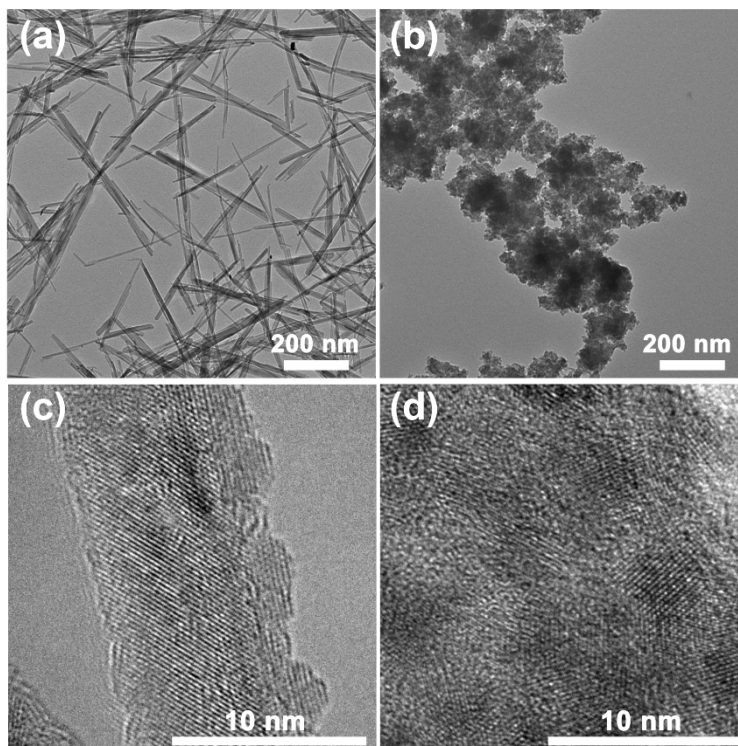

**Figure S15.** TEM images of OMS-2-HH (a) and MnO<sub>x</sub>-HHB (b). HRTEM images of OMS-2-HH (c) and MnO<sub>x</sub>-HHB (d).

**Figure S15** shown the TEM and HRTEM images of OMS-2-HH and MnO<sub>x</sub>-HHB, which are consisted with the the reported results. OMS-2-HH presented a rough surface, which induced abundant surface oxygen vacancy. MnO<sub>x</sub>-HHB presented a low crystallinity and abundant crystal boundary formed, which resulted in a low AOS of Mn atoms (the reported AOS of Mn atoms was 3.43).

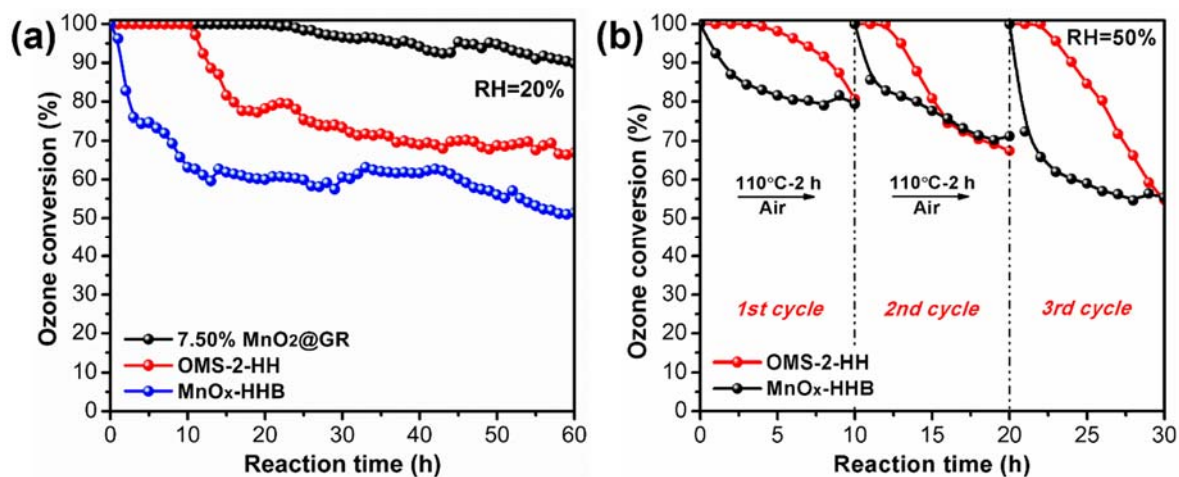

**Figure S16.** The comparison on the regeneration ability of MnO<sub>2</sub>@GR and reported catalysts under different conditions. (a) Comparison of ozone conversion with 7.50% MnO<sub>2</sub>@GR and other reported catalysts. (b) Ozone conversion on OMS-2-HH and MnO<sub>x</sub>-HH at 50% RH and their regeneration performance (Regenerate condition: 110°C, air atmosphere).

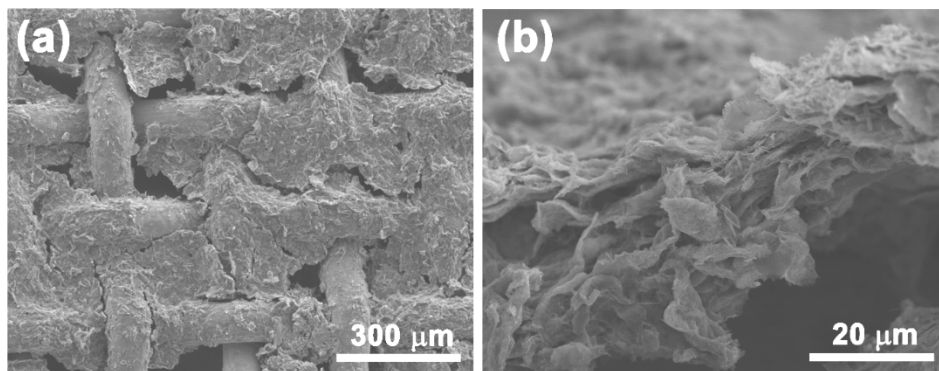

**Figure S17.** SEM images of 7.50% MnO<sub>2</sub>@GR coated stainless steel mesh.

As shown in **figure S17**, 7.50% MnO<sub>2</sub>@GR was built into a lamellar structure and uniformly coated on the wire mesh (10 × 15 cm), using graphene layer as the framework.

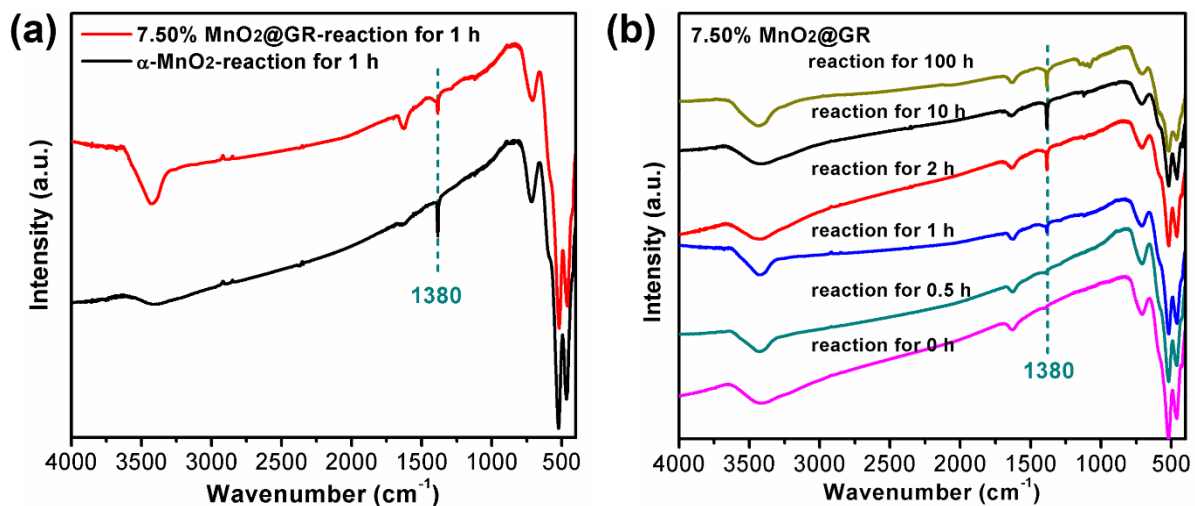

**Figure S18.** The accumulation of intermediated oxygen species. (a) FT-IR spectra of  $\alpha$ -MnO<sub>2</sub> and 7.50% MnO<sub>2</sub>@GR treated with O<sub>3</sub> for 1 h. (b) FT-IR spectra of 7.50% MnO<sub>2</sub>@GR treated with O<sub>3</sub> for different time.

**Figure S18a** showed the accumulation of the intermediated oxygen species on the 7.50% MnO<sub>2</sub>@GR was lower than the  $\alpha$ -MnO<sub>2</sub> nanowire. **Figure S18** showed the accumulation of the intermediated oxygen species on the 7.50% MnO<sub>2</sub>@GR was remained stable after 2 h.

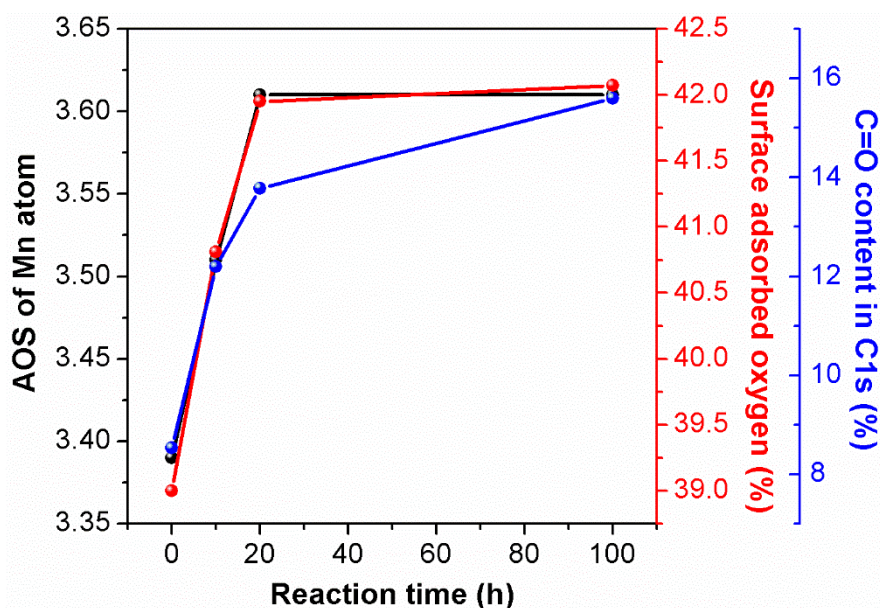

**Figure S19.** The AOS of Mn, surface adsorbed oxygen content in O 1s and C=O content in C1s after 7.50% MnO<sub>2</sub>@GR treated with ozone for different time.

As shown in **Figure S19**, the AOS of Mn and surface adsorbed oxygen content have same variation tendency. The variation of C=O content was slightly slow, which confirmed that the nongraphitic impurities in graphene shells would be oxidized to C=O groups and COOH groups. These results suggested the oxidation state of Mn was closely related to the surface oxygen species in 7.50% MnO<sub>2</sub>@GR.

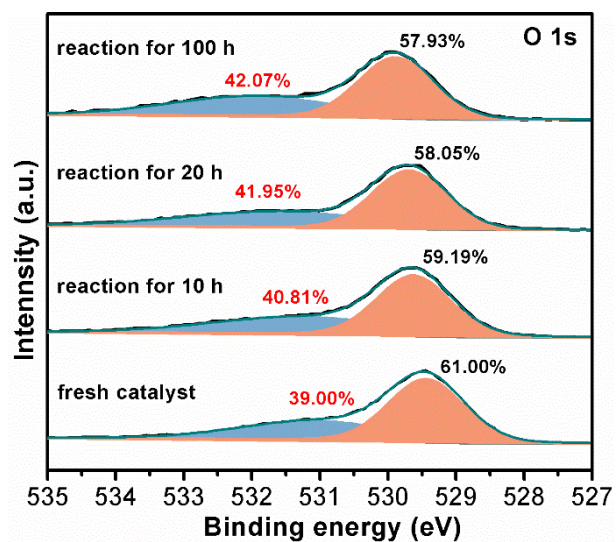

**Figure S20.** Analysis of the surface bonding environment via XPS. O 1s spectra of 7.50% MnO<sub>2</sub>@GR treated with ozone for different time.

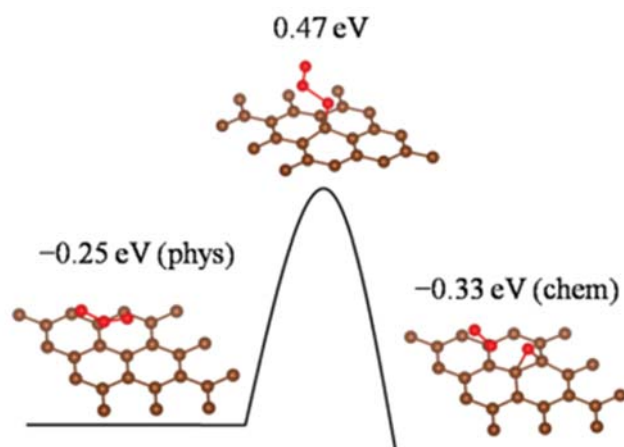

**Figure S21.** Dissociative chemisorption of an ozone molecule from the physisorbed state is shown with the transition state.<sup>8</sup>

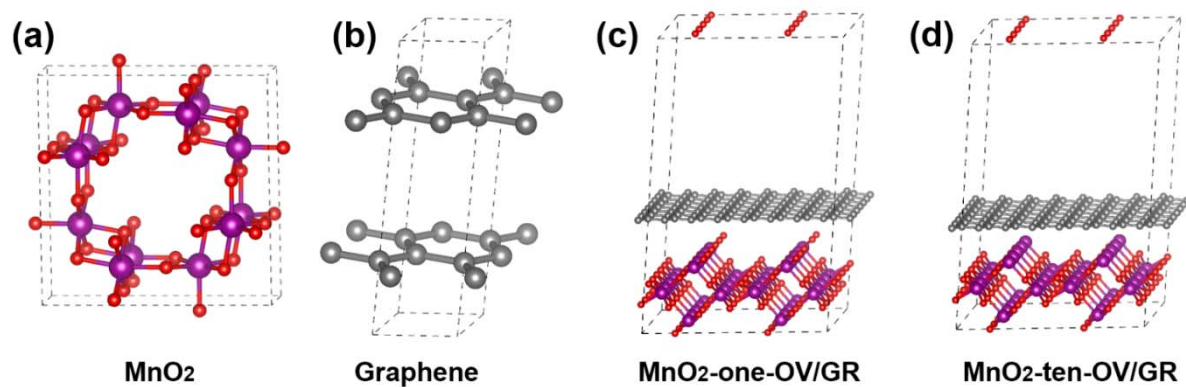

**Figure S22.** The initial crystal structures of MnO<sub>2</sub> (a) and graphene. (b) The models of MnO<sub>2</sub>-one-OV/GR and MnO<sub>2</sub>-ten-OV/GR heterojunctions.



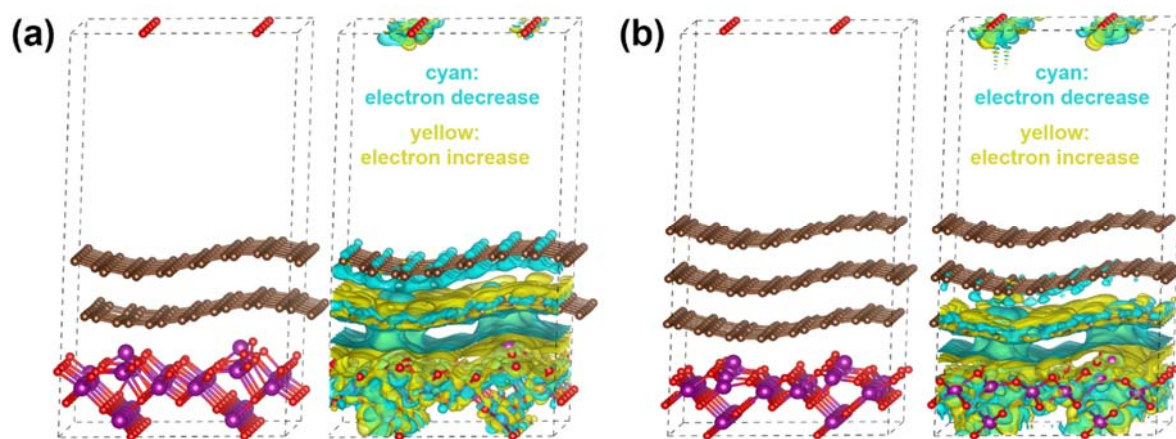

**Figure S23.** The optimized structure of MnO<sub>2</sub>-ten-OV@GR with different graphene layers and their charge density differences. (The yellow and cyan regions refer to increased and decreased charge distributions, respectively. The isosurface value of the colour region is 0.0001e-Å<sup>-3</sup>. The purple, red and gray ball in the models corresponds to the Mn, oxygen and carbon atoms, respectively.)

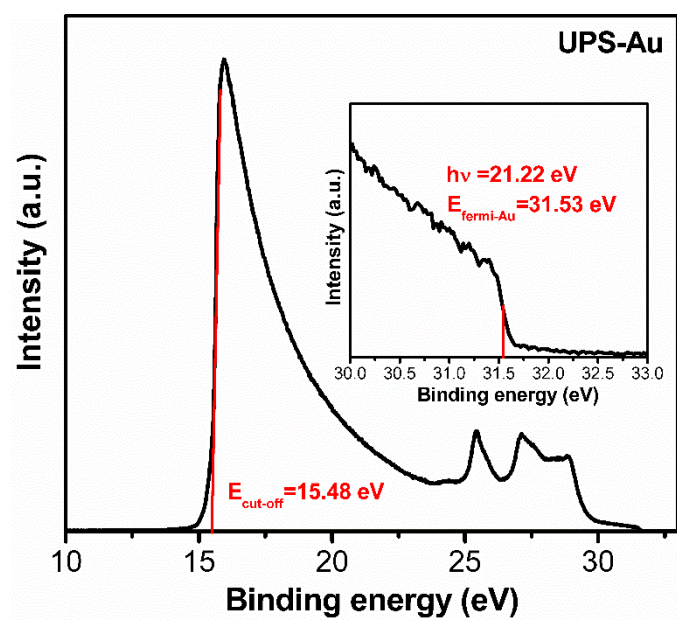

Figure S24. Ultraviolet Photoelectron Spectroscopy of Au.

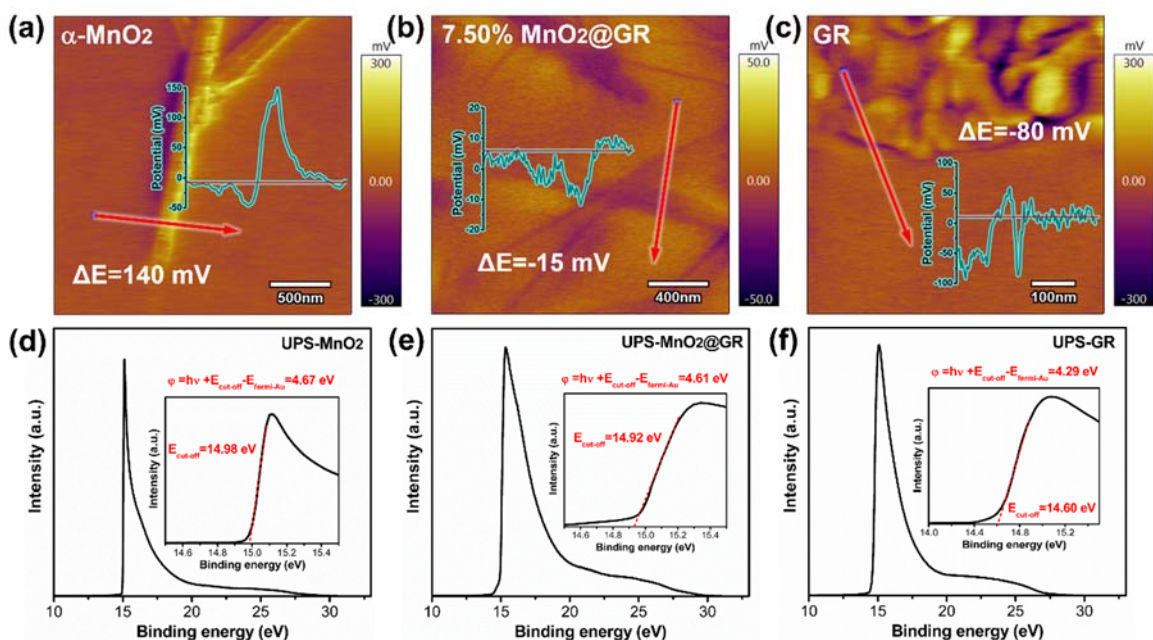

**Figure S25.** The unique surface electronic structure in MnO<sub>2</sub>@GR. Surface potential of  $\alpha$ -MnO<sub>2</sub> (a), 7.50% MnO<sub>2</sub>@GR (b) and GR (c). UPS spectra of  $\alpha$ -MnO<sub>2</sub> (d), 7.50% MnO<sub>2</sub>@GR (e) and GR (f).

To explore the reason why the accumulation of peroxide species is inhibited, the surface electronic structure is investigated. Firstly, the average electronic potential on the catalyst surface is measured by Atomic Force Microscope with a Kelvin Probe. As shown in **figure S25a-c**, the surface potential of  $\alpha$ -MnO<sub>2</sub> nanowire is higher (140 mV) than that of the mica sheet, while that of GR is lower (80 mV) than that of the mica sheet. For 7.50% MnO<sub>2</sub>@GR, the surface potential is lower (15 mV) than that of the mica sheet, between the value of  $\alpha$ -MnO<sub>2</sub> nanowire and 7.50% MnO<sub>2</sub>@GR. These results indicate that the average work function is varied as followed:  $\alpha$ -MnO<sub>2</sub> > 7.50% MnO<sub>2</sub>@GR > GR. As a result, the difference on work function drives the electrons transfer from the graphene shells to inner  $\alpha$ -MnO<sub>2</sub> nanofiber in the core-shell structure of MnO<sub>2</sub>@GR. Besides, the average work function (4.67 eV for  $\alpha$ -MnO<sub>2</sub>, 4.61 eV for 7.50% MnO<sub>2</sub>@GR, and 4.29 eV for GR) calculated from the UPS spectra (**figure S24**) further confirms that the graphene shell indeed modifies the surface electronic structure as shown in **figure S25d-e**.

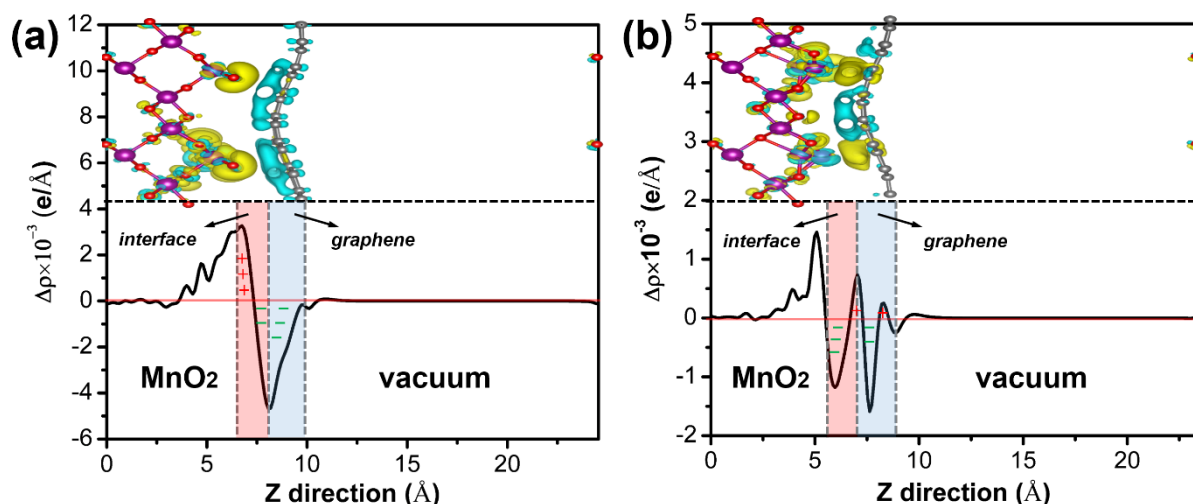

**Figure S26.** The front view of the charge density differences (above) in MnO<sub>2</sub>-one-OV@GR (a) and MnO<sub>2</sub>-ten-OV@GR (b). The isosurface value of the color region is  $0.01\text{e}\cdot\text{\AA}^{-3}$ . Planar-averaged electron density difference (below) in MnO<sub>2</sub>-one-OV@GR (a) and MnO<sub>2</sub>-ten-OV@GR (b) along the Z direction, where the positive values refers to the increased electron and the negative values refers to the decreased charge distribution.

As shown in **figure S26a**, the electron density increased on the surface of MnO<sub>2</sub> and decreased on graphene shell, suggesting the electron transfer from MnO<sub>2</sub> to graphene in MnO<sub>2</sub>-one-OV@GR. However, for MnO<sub>2</sub>-ten-OV@GR (**figure S26b**), the electron density difference is different and varied with the position, which further confirmed the electron transfer direction depends on the exposed atoms on the surface of MnO<sub>2</sub>.

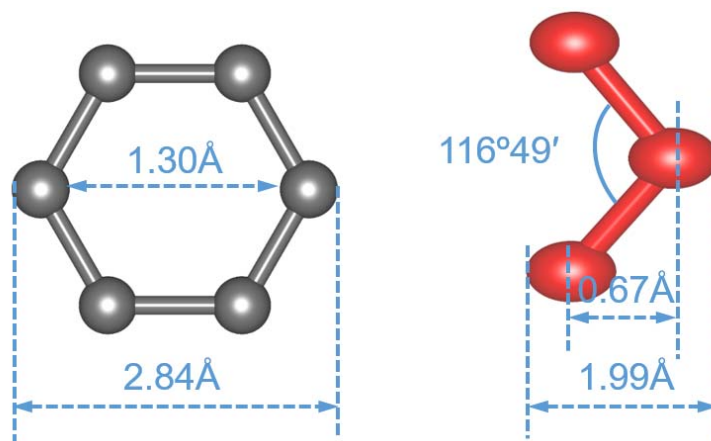

**Figure S27.** The model of graphene unit (left) and ozone molecule (right).

As shown in **figure S27**, the carbon-carbon bond was  $1.42\text{\AA}$  in graphene and the covalent radius of carbon atom was  $0.77\text{\AA}$ . Thus, the biggest pore size of benzene ring was  $1.30\text{\AA}$  considering the covalent radius. For ozone molecule, the oxygen-oxygen bond was  $1.28\text{\AA}$  and its angle was  $116^{\circ}49'$ . The covalent radius of oxygen atom was  $0.66\text{\AA}$ . Thus, the smallest size was  $1.99\text{\AA}$ . Thus, ozone molecule can't enter the confined space between graphene layer and manganese oxide by the hole of benzene ring. Although some small molecule can enter the confined space under graphene through open channels at island edges, the process was very slow.<sup>9</sup> However, ozone catalytic decomposition on  $7.50\% \text{ MnO}_2@\text{GR}$  was quick and high-throughput. Therefore, the surface of Mn in the confined space between graphene layer and manganese oxide was not the main active site for ozone decomposition.

**Table S1.** Comparison of ozone catalytic decomposition performance between MnO<sub>2</sub>@GR and other reported materials.

| Catalyst                                                   | Inlet ozone concentration [ppm] | Reaction temperature [°C] | Relative humidity [%] | Space velocity [L/g·h] | Ozone conversion [%]                                          | References       |
|------------------------------------------------------------|---------------------------------|---------------------------|-----------------------|------------------------|---------------------------------------------------------------|------------------|
| <b>MnO<sub>2</sub>@GR</b>                                  | <b>50</b>                       | <b>25</b>                 | <b>20</b>             | <b>540</b>             | <b>100 (20 h) / 80 (100 h)</b>                                | <b>This work</b> |
|                                                            |                                 |                           | <b>50</b>             |                        | <b>67 (30 h)</b>                                              |                  |
| <b>MnO<sub>2</sub>@GR (coated on stainless steel mesh)</b> | <b>50</b>                       | <b>25</b>                 | <b>50</b>             | <b>216</b>             | <b>70 (100 h)</b>                                             |                  |
| <b>OMS-2-HH</b>                                            | <b>40</b>                       | <b>30</b>                 | <b>90</b>             | <b>600</b>             | <b>75 (6 h)</b>                                               | <b>6</b>         |
| Fe- $\alpha$ -MnO <sub>2</sub>                             | 10000                           | 25                        | 90                    | 12                     | 90 (8 h)                                                      | 10               |
| LaFeO <sub>3</sub>                                         | 200                             | 25                        | 90                    | 240                    | 85 (8 h)                                                      | 11               |
| Cu <sub>2</sub> O Cube                                     | 200                             | 25                        | 80                    | 60                     | 100 (8 h)                                                     | 12               |
| <b>MnO<sub>x</sub>-HHB</b>                                 | <b>20</b>                       | <b>25</b>                 | <b>50</b>             | <b>600</b>             | <b>100 (12 h)</b>                                             | <b>7</b>         |
| W- $\alpha$ -MnO <sub>2</sub>                              | 120                             | 25                        | 65                    | 660                    | 50 (4 h)                                                      | 13               |
| Ce- $\alpha$ -MnO <sub>2</sub>                             | 40                              | 30                        | 65                    | 840                    | 96 (6 h)                                                      | 14               |
| Ag-MnO <sub>x</sub>                                        | 40                              | 30                        | 65                    | 840                    | 81 (6 h)                                                      | 15               |
| Fe-MnO <sub>x</sub>                                        | 100                             | 25                        | 60                    | 660                    | 73 (6 h)                                                      | 16               |
| MnCO <sub>3</sub> +MnO <sub>2</sub>                        | 120                             | 25                        | 50                    | 600                    | 65 (5 h)                                                      | 17               |
| $\alpha$ -MnO <sub>2</sub> nanofiber                       | 23                              | 25                        | 45                    | 880                    | 80 (2 h)                                                      | 18               |
| Co-MnO <sub>x</sub>                                        | 1000                            | 25                        | 50                    | 48                     | 66 (12 h)                                                     | 19               |
| $\alpha$ , $\beta$ , $\gamma$ -MnO <sub>2</sub>            | 14                              |                           | dry                   | 660                    | -MnO <sub>2</sub> > -<br>MnO <sub>2</sub> > -MnO <sub>2</sub> | 20               |
| MnCO <sub>3</sub>                                          | 14                              | 25                        | dry                   | 460                    | 85 (22 h)                                                     | 21               |

To define the advantages of MnO<sub>2</sub>@GR in ozone conversion, the performance of latest reported catalyst was listed in **Table S1**. Among these materials, OMS-2-HH and MnO<sub>x</sub>-HHB displayed best performance for ozone decomposition.

**Table S2** Lattice parameters of MnO<sub>2</sub> layer, graphene layer, MnO<sub>2</sub>-one-OV/GR and MnO<sub>2</sub>-ten-OV/GR heterojunctions.

| <b>Model</b>                     | <b>a (Å)</b> | <b>b (Å)</b> |
|----------------------------------|--------------|--------------|
| <b>MnO<sub>2</sub></b>           | 14.618       | 16.526       |
| <b>graphene</b>                  | 14.793       | 17.258       |
| <b>MnO<sub>2</sub>-one-OV/GR</b> | 14.705       | 16.893       |
| <b>MnO<sub>2</sub>-ten-OV/GR</b> | 14.705       | 16.893       |

## References

1. Chen C., Xu K., Ji X., Zhang B., Miao L. & Jiang J. Enhanced electrochemical performance by facile oxygen vacancies from lower valence-state doping for ramsdellite-MnO<sub>2</sub>. *J. Mater. Chem. A* **3**, 12461-12467 (2015).
2. Zhu G., et al. Surface oxygen vacancy induced  $\alpha$ -MnO<sub>2</sub> nanofiber for highly efficient ozone elimination. *Appl. Catal., B* **209**, 729-737 (2017).
3. Chen S., Zhu J., Wu X., Han Q. & Wang X. Graphene Oxide–MnO<sub>2</sub> Nanocomposites for Supercapacitors. *ACS Nano* **4**, 2822-2830 (2010).
4. Xiao Z., Ning G., Ma X., Zhao L., Yu Y. & Wang H. Hydrothermal assembly of MnO-graphene core-shell nanowires with superior anode performance. *Carbon* **142**, 461-467 (2019).
5. Qiu B., Xing M., Zhang J. Mesoporous TiO<sub>2</sub> Nanocrystals Grown in Situ on Graphene Aerogels for High Photocatalysis and Lithium-Ion Batteries. *J. Am. Chem. Soc.* **136**, 5852-5855 (2014).
6. Ma J., Wang C. & He H. Transition metal doped cryptomelane-type manganese oxide catalysts for ozone decomposition. *Appl. Catal., B* **201**, 503-510 (2017).
7. Liu S., Ji J., Yu Y. & Huang H. Facile synthesis of amorphous mesoporous manganese oxides for efficient catalytic decomposition of ozone. *Catal. Sci. Technol.* **8**, 4264-4273 (2018).
8. Lee, G., Lee, B., Kim, J. & Cho, K. Ozone Adsorption on Graphene: Ab Initio Study and Experimental Validation. *J. Phys. Chem. C* **113**, 14225-14229 (2009).
9. Mu, R. et al. Visualizing Chemical Reactions Confined under Graphene. *Angew. Chem. Int. Ed.* **51**, 4856-4859 (2012).
10. Lian Z., Ma J. & He H. Decomposition of high-level ozone under high humidity over Mn–Fe catalyst: The influence of iron precursors. *Catal. Commun.* **59**, 156-160 (2015).
11. Gong S., Xie Z., Li W., Wu X., Han N. & Chen Y. Highly active and humidity resistive perovskite LaFeO<sub>3</sub> based catalysts for efficient ozone decomposition. *Appl. Catal., B* **241**, 578-587 (2019).
12. Gong S., et al. Low temperature decomposition of ozone by facilely synthesized cuprous oxide catalyst. *New J. Chem.* **41**, 4828-4834 (2017).
13. Yang Y., Jia J., Liu Y. & Zhang P. The effect of tungsten doping on the catalytic activity of  $\alpha$ -MnO<sub>2</sub> nanomaterial for ozone decomposition under humid condition. *Appl. Catal., A* **562**, 132-141 (2018).
14. Li X., et al. Oxygen Vacancies Induced by Transition Metal Doping in  $\gamma$ -MnO<sub>2</sub> for Highly Efficient Ozone Decomposition. *Environ. Sci. Technol.* **52**, 12685-12696 (2018).



15. Li X., Ma J., Zhang C., Zhang R. & He H. Facile synthesis of Ag-modified manganese oxide for effective catalytic ozone decomposition. *J. Environ. Sci.* **80**, 159-168 (2019).
16. Jia J., Yang W., Zhang P. & Zhang J. Facile synthesis of Fe-modified manganese oxide with high content of oxygen vacancies for efficient airborne ozone destruction. *Appl. Catal., A* **546**, 79-86 (2017).
17. Liu Y., Zhang P., Zhan J. & Liu L. Heat treatment of MnCO<sub>3</sub>: An easy way to obtain efficient and stable MnO<sub>2</sub> for humid O<sub>3</sub> decomposition. *Appl. Surf. Sci.* **463**, 374-385 (2019).
18. Jia J., Zhang P. & Chen L. The effect of morphology of  $\alpha$ -MnO<sub>2</sub> on catalytic decomposition of gaseous ozone. *Catal. Sci. Technol.* **6**, 5841-5847 (2016).
19. Tao L., Zhao G., Chen P., Zhang Z., Liu Y. & Lu Y. High-Performance Co-MnO<sub>x</sub> Composite Oxide Catalyst Structured onto Al-Fiber Felt for High-Throughput O<sub>3</sub> Decomposition. *ChemCatChem* **11**, 1131-1142 (2019).
20. Jia J., Zhang P. & Chen L. Catalytic decomposition of gaseous ozone over manganese dioxides with different crystal structures. *Appl. Catal., B* **189**, 210-218 (2016).
21. Jia J. & Zhang P. Catalytic Decomposition of Airborne Ozone by MnCO<sub>3</sub> and its Mechanism. *Ozone: Sc. Eng.* **40**, 21-28 (2018).
